# Supplementary material
Source: ML conference proceedings conference paper supplement (https://proceedings.mlr.press/v70/jabbari17a.html)
Supplement: Supplementary file [file jabbari17a-supp.pdf]

## A. Omitted Proofs

### A.1. Omitted Proofs for Section 2

*Proof of Lemma 1.* Let  $\hat{\mu}_T^\pi$  denote the distribution of  $\pi$  on states of  $M$  after following  $\pi$  for  $T$  steps starting from  $s$ . Then we know

$$\begin{aligned} \mathbb{E}_{s \sim \mu^\pi} V_M^\pi(s) &- \frac{1}{T} \mathbb{E} \sum_{t=1}^T V_M^\pi(s_t) \\ &= \sum_{i=1}^n (\mu^\pi(s_i) - \hat{\mu}_T^\pi(s_i)) V_M^\pi(s_i) \\ &\leq \sum_{i=1}^n |\mu^\pi(s_i) - \hat{\mu}_T^\pi(s_i)| V_M^\pi(s_i) \\ &\leq \frac{\epsilon}{1-\gamma}. \end{aligned}$$

The last inequality is due to the following observations: (i)  $V_M^\pi(s_i) \leq \frac{1}{1-\gamma}$  as rewards are in  $[0, 1]$  and (ii)  $\sum_{i=1}^n |\mu^\pi(s_i) - \hat{\mu}_T^\pi(s_i)| \leq \epsilon$  since  $T$  is at least the  $\epsilon$ -mixing time of  $\pi$ .  $\square$

### A.2. Omitted Proofs for Section 3

We first state the following useful Lemma about  $M$ .

**Lemma 11.** *Let  $M$  be the MDP in Definition 6. Then for any  $i \in \{1, \dots, n\}$ ,  $V_M^*(s_i) < \frac{1+2\gamma^{n-i+1}}{2(1-\gamma)}$ .*

*Proof.*

$$\begin{aligned} V_M^*(s_i) &= \text{discounted reward before reaching state } n \\ &\quad + \text{discounted reward from staying at state } n \\ &< \left[ \sum_{t=1}^{n-i-1} \frac{\gamma^t}{2} \right] + \frac{\gamma^{n-i+1}}{1-\gamma} \\ &= \left[ \frac{1}{2} \left( \frac{1}{1-\gamma} - \frac{\gamma^{n-i}}{1-\gamma} \right) \right] + \frac{\gamma^{n-i+1}}{1-\gamma} \\ &= \frac{1-\gamma^{n-i}}{2(1-\gamma)} + \frac{\gamma^{n-i+1}}{1-\gamma} \\ &= \frac{1+\gamma^{n-i}(2\gamma-1)}{2(1-\gamma)} \\ &< \frac{1+2\gamma^{n-i+1}}{2(1-\gamma)}, \end{aligned}$$

via two applications of the summation formula for geometric series.  $\square$

*Proof of Theorem 3.* We prove Theorem 3 for the special case of  $k = 2$  first. Consider coupling the run of a fair algorithm  $\mathcal{L}$  on both  $M(0.5)$  and  $M(1)$ . To achieve this, we can fix the randomness of  $\mathcal{L}$  up front, and use the same randomness on both MDPs. The set of observations and

hence the actions taken on both MDPs are identical until  $\mathcal{L}$  reaches state  $s_n$ . Until then, with probability at least  $1 - \delta$ ,  $\mathcal{L}$  must play  $L$  and  $R$  with equal probability in order to satisfy fairness (since, for  $M(0.5)$ , the only fair policy is to play both actions with equal probability at each time step). We will upper-bound the optimality of uniform play and lower-bound the number of rounds before which  $s_n$  is visited by uniformly random play.

Let  $f_\gamma = \lceil \frac{1}{1-\sqrt[3]{\gamma}} \rceil$  and  $\mathcal{T} = 2^{n-2f_\gamma}$  for  $n \geq 100(f_\gamma)^2$ . First observe that the probability of reaching a fixed state  $s_i$  for any  $i \geq n - f_\gamma$  from a random walk of length  $\mathcal{T}$  is upper bounded by the probability that the random walk takes  $i \geq n - f_\gamma$  consecutive steps to the right in the first  $\mathcal{T}$  steps. This probability is at most  $p = 2^{n-2f_\gamma} (\frac{1}{2})^{n-f_\gamma} = 2^{-f_\gamma}$  for any fixed  $i$ . Since reaching any state  $i > i'$  requires reaching state  $i'$ , the probability that the  $\mathcal{T}$  step random walk arrives in any state  $s_i$  for  $i \geq n - f_\gamma$  is also upper bounded by  $p$ .

Next, we observe that  $V_M^*(s_i)$  is a nondecreasing function of  $i$  for both MDPs. Then the average  $V_M^*$  values of the visited states of *any* fair policy can be broken into two pieces: the average conditioned on (the probability at least  $1 - \delta$  event) that the algorithm plays uniformly at random before reaching state  $s_n$  and never reaching a state beyond  $s_{n-f_\gamma}$ , and the average conditioned on (the probability at most  $\delta$  event) that the algorithm does not make uniformly random choices or the uniform random walk of length  $\mathcal{T}$  reaches a state beyond  $s_{n-f_\gamma}$ . So, we have that

$$\begin{aligned} \frac{1}{\mathcal{T}} \mathbb{E} \sum_{t=1}^{\mathcal{T}} V_M^*(s_t) &\leq (1-p-\delta) V_M^*(s_{n-f_\gamma}) + (p+\delta) \frac{1}{1-\gamma} \\ &\leq (1-p-\delta) \frac{1+2\gamma^{f_\gamma+1}}{2(1-\gamma)} + (p+\delta) \frac{1}{1-\gamma}. \end{aligned}$$

The first inequality follows from the fact that  $V_M^*(s_i) \leq \frac{1}{1-\gamma}$  for all  $i$ , and the second from Lemma 11 along with  $V_M^*$  values being nondecreasing in  $i$ . Putting it all together,

$$\begin{aligned} \mathbb{E}_{s \sim \mu^*} V_M^*(s) &- \frac{1}{\mathcal{T}} \mathbb{E} \sum_{t=1}^{\mathcal{T}} V_M^*(s_t) \\ &\geq \frac{1}{1-\gamma} - \left[ (1-p-\delta) \frac{1+2\gamma^{f_\gamma+1}}{2(1-\gamma)} + (p+\delta) \frac{1}{1-\gamma} \right] \\ &= \frac{1-p-\delta}{1-\gamma} \left[ 1 - \frac{1+2\gamma^{f_\gamma+1}}{2} \right]. \end{aligned}$$

So  $\epsilon$ -optimality requires

$$\frac{2\epsilon}{1-\gamma} \geq \frac{1-p-\delta}{1-\gamma} \left[ 1 - \frac{1+2\gamma^{f_\gamma+1}}{2} \right]. \quad (4)$$

However, if  $\epsilon < \frac{1}{8}$  we get

$$\begin{aligned} \frac{2\epsilon}{1-\gamma} &< \frac{1-0.04-1/4}{1-\gamma} \left[ 1 - \frac{1+2 \times e^{-3}}{2} \right] \\ &< \frac{1-2^{-f_\gamma}-\delta}{1-\gamma} \left[ 1 - \frac{1+2\gamma^{f_\gamma+1}}{2} \right], \end{aligned}$$

where the third inequality follows when  $\delta < \frac{1}{4}$  and  $\gamma > \frac{1}{2}$ . This means  $\epsilon < \frac{1}{8}$  makes  $\epsilon$ -optimality impossible, as desired.

Throughout we considered the special case of  $k = 2$  and proved a lower bound of  $\Omega(2^n)$  time steps for any fair algorithm satisfying the  $\epsilon$ -optimality condition. However, it is easy to see that MDP  $M$  in Definition 6 can be easily modified in a way that  $k - 1$  of the actions from state  $s_i$  reach state  $s_1$  and only one action in each state  $s_i$  reaches states  $s_{\min\{i+1, n\}}$ . Hence, a lower bound of  $\Omega(k^n)$  time steps can be similarly proved.  $\square$

*Proof of Theorem 4.* We mimic the argument used to prove Theorem 3 with the difference that, until visiting  $s_n$ ,  $\mathcal{L}$  may not play  $R$  with probability more than  $\frac{1}{2} + \alpha$  (as opposed to  $\frac{1}{2}$  in Theorem 3). Let  $f_\gamma = \lceil \frac{1}{1-\frac{1}{\sqrt[3]{\gamma}}} \rceil$  and  $\mathcal{T} = (\frac{2}{1+2\alpha})^{n-2f_\gamma}$  for  $n \geq 100(f_\gamma)^2$ . By a similar process as in Theorem 3, the probability of reaching state  $s_i$  for any  $i \geq n - f_\gamma$  from a random walk of length  $\mathcal{T}$  is bounded by  $p = (\frac{2}{1+2\alpha})^{-f_\gamma}$ , and so the probability that the  $\mathcal{T}$  steps random walk arrives in any state  $s_i$  for  $i \geq n - f_\gamma$  is bounded by  $p$ . Carrying out the same process used to prove Theorem 3 then once more implies that  $\epsilon$ -optimality requires Equation 4 to hold when  $\delta < \frac{1}{4}$ ,  $\alpha < \frac{1}{4}$  and  $\gamma > \frac{1}{2}$ . Hence,  $\epsilon < \frac{1}{8}$  violates this condition as desired.

Finally, throughout we considered the special case of  $k = 2$ . The same trick as in the proof of Theorem 3 can be used to prove the lower bound of  $\Omega((\frac{k}{1+k\alpha})^n)$  time steps for any fair algorithm satisfying the  $\epsilon$ -optimality condition.  $\square$

*Proof of Theorem 5.* We also prove Theorem 5 for the special case of  $k = 2$  first, again considering the MDP in Definition 6. We set the size of the state space in  $M$  to be  $n = \lceil \frac{\log(\frac{1}{2\alpha})}{1-\gamma} \rceil$ . Then given the parameter ranges, for any  $i$ ,  $Q_M^*(s_i, R) - Q_M^*(s_i, L) > \alpha$  in  $M(1)$ . Therefore, any approximate-action fair algorithm should play actions  $R$  and  $L$  with equal probability.

Let  $\mathcal{T} = 2^{cn} = \Omega((2^{1/(1-\gamma)})^c)$ . First observe that the probability of reaching a fixed state  $s_i$  for any  $i \geq (c+1)n/2$  from a random walk of length  $\mathcal{T}$  is upper bounded by the probability that the random walk takes  $i \geq (c+1)n/2$  consecutive steps to the right in the first  $\mathcal{T}$  steps. This probability is at most  $p = 2^{cn} 2^{-(c+1)n/2} = 2^{(c-1)n/2}$  for any fixed  $i$ . Then the probability that the  $\mathcal{T}$  steps random walk

arrives in any state  $s_i$  for  $i \geq (c+1)n/2$  is also upper bounded by  $p$ .

Next, we observe that  $V_M^*(s_i)$  is a nondecreasing function of  $i$ , for both MDPs. Then the average  $V_M^*$  values of the visited states of *any* fair policy can be broken into two pieces: the average conditioned on the  $1 - \delta$  fairness *and* never reaching a state beyond  $s_{(c+1)n/2}$ , and the average when fairness might be violated *or* the uniform random walk of length  $\mathcal{T}$  reaches a state beyond  $s_{(c+1)n/2}$ . So, we have that

$$\begin{aligned} \frac{1}{\mathcal{T}} \mathbb{E} \sum_{t=1}^{\mathcal{T}} V_M^*(s_t) &\leq (1-p-\delta) V_M^*(s_{(c+1)n/2}) \\ &\quad + (p+\delta) \frac{1}{1-\gamma} \\ &\leq (1-p-\delta) \frac{1+(2\gamma-1)\gamma^{\frac{(1-c)n}{2}}}{2(1-\gamma)} \\ &= (p+\delta) \frac{1}{1-\gamma}. \end{aligned}$$

The first inequality follows from the fact that  $V_M^*(s_i) \leq \frac{1}{1-\gamma}$  for all  $i$ , and the second from (the line before the last in) Lemma 11 along with  $V_M^*$  values being nondecreasing in  $i$ . Putting it all together,

$$\begin{aligned} \mathbb{E}_{s \sim \mu^*} V_M^*(s) - \frac{1}{\mathcal{T}} \mathbb{E} \sum_{t=1}^{\mathcal{T}} V_M^*(s_t) &\geq \frac{1}{1-\gamma} - (1-p-\delta) \frac{1+(2\gamma-1)\gamma^{\frac{(1-c)n}{2}}}{2(1-\gamma)} \\ &\quad - (p+\delta) \frac{1}{1-\gamma} \\ &= \frac{1-p-\delta}{1-\gamma} \left[ 1 - \frac{1+(2\gamma-1)\gamma^{\frac{(1-c)n}{2}}}{2} \right] \\ &= \frac{1-p-\delta}{1-\gamma} \left[ \frac{1}{2} - \frac{(2\gamma-1)\gamma^{\frac{(1-c)n}{2}}}{2} \right]. \end{aligned}$$

So  $\epsilon$ -optimality requires

$$\frac{2\epsilon}{1-\gamma} \geq \frac{1-p-\delta}{1-\gamma} \left[ \frac{1}{2} - \frac{(2\gamma-1)\gamma^{\frac{(1-c)n}{2}}}{2} \right].$$

Rearranging and using  $\delta < \frac{1}{4}$ , we get that  $\epsilon$ -optimality requires

$$4\epsilon \geq \left[ 0.75 - 2^{\frac{(c-1)n}{2}} \right] \left[ 1 - (2\gamma-1)\gamma^{\frac{(1-c)n}{2}} \right]$$

and expand  $n$  to get

$$\begin{aligned} \epsilon &\geq \frac{1}{4} \left[ 0.75 - 2^{\frac{(c-1) \log(\frac{1}{2\alpha})}{2(1-\gamma)}} \right] \times \\ &\quad \left[ 1 - (2\gamma-1)\gamma^{\frac{(1-c) \log(\frac{1}{2\alpha})}{2(1-\gamma)}} \right] \equiv \frac{xy}{4}. \end{aligned}$$

Noting that  $x$  is minimized when  $2 \frac{(c-1) \log(\frac{1}{2\alpha})}{2(1-\gamma)}$  is maximized, and that this quantity is maximized when  $\frac{\log(\frac{1}{2\alpha})}{2(1-\gamma)}$  is minimized (as  $c-1$  is negative), we get that  $\epsilon$ -optimality requires

$$\epsilon \geq \frac{[0.75 - 2^{\frac{c-1}{1-\gamma}}] y}{4}$$

from  $\alpha < \frac{1}{8}$ . Similarly,  $\alpha < \frac{1}{8}$  implies that  $\epsilon$ -optimality requires

$$\epsilon \geq \frac{[0.75 - 2^{\frac{c-1}{1-\gamma}}] [1 - (2\gamma - 1)\gamma^{\frac{1-c}{1-\gamma}}]}{4}.$$

Note that  $0.75 - 2^{\frac{c-1}{1-\gamma}}$  is minimized when  $\gamma$  is small, so  $\gamma > c$  implies that  $\epsilon$ -optimality requires

$$\begin{aligned} \epsilon &\geq \frac{[0.75 - 2^{-1}] [1 - (2\gamma - 1)\gamma^{\frac{1-c}{1-\gamma}}]}{4} \\ &\geq \frac{1}{16} [1 - (2\gamma - 1)\gamma^{\frac{1-c}{2(1-\gamma)}}]. \end{aligned}$$

Conversely,  $1 - (2\gamma - 1)\gamma^{\frac{1-c}{1-\gamma}}$  is minimized when  $\gamma$  is large, so as

$$\lim_{\gamma \rightarrow 1} (2\gamma - 1)\gamma^{\frac{1-c}{1-\gamma}} = e^{c-1}$$

we get that  $\epsilon$ -optimality requires

$$\epsilon \geq \frac{1}{16} (1 - e^{c-1}).$$

Finally, the same trick as in the proof of Theorem 3 can be used to prove the  $\Omega((k^{1/(1-\gamma)})^c)$  lower bound for  $k > 2$  actions.  $\square$

### A.3. Omitted Proofs for Section 4

*Proof of Lemma 8.* We first show that either

- there exists an *exploitation policy*  $\pi$  in  $M_\Gamma$  such that

$$\frac{1}{T} \max_{\bar{\pi} \in \Pi} \mathbb{E} \sum_{t=1}^T V_M^{\bar{\pi}}(\bar{\pi}^t(s), T) - \frac{1}{T} \mathbb{E} \sum_{t=1}^T V_{M_\Gamma}^\pi(\pi^t(s), T) \leq \beta$$

where the random variables  $\pi^t(s)$  and  $\bar{\pi}^t(s)$  denote the states reached from  $s$  after following  $\pi$  and  $\bar{\pi}$  for  $t$  steps, respectively, or

- there exists an *exploration policy*  $\pi$  in  $M_\Gamma$  such that the probability that a walk of  $2T$  steps from  $s$  following  $\pi$  will terminate in  $s_0$  exceeds  $\frac{\beta}{T}$ .

Let  $\pi$  be a policy in  $M$  satisfying

$$\frac{1}{T} \mathbb{E} \sum_{t=1}^T V_M^\pi(\pi^t(s), T) = \frac{1}{T} \max_{\bar{\pi} \in \Pi} \mathbb{E} \sum_{t=1}^T V_M^{\bar{\pi}'}(\bar{\pi}^t(s), T) := \tilde{V}.$$

For any state  $s'$ , let  $p(s')$  denote all the paths of length  $T$  in  $M$  that start in  $s'$ ,  $q(s')$  denote all the paths of length  $T$  in  $M$  that start in  $s'$  such that all the states in every path of length  $T$  in  $q(s')$  are in  $\Gamma$  and  $r(s')$  all the paths of length  $T$  in  $M$  that start in  $s'$  such that at least one state in every path of length  $T$  in  $r(s')$  is not in  $\Gamma$ . Suppose

$$\frac{1}{T} \mathbb{E} \sum_{t=1}^T V_{M_\Gamma}^\pi(\pi^t(s)) < \tilde{V} - \beta.$$

Otherwise,  $\pi$  already witnesses the claim. We show that a walk of  $2T$  steps from  $s$  following  $\pi$  will terminate in  $s_0$  with probability of at least  $\frac{\beta}{T}$ . First,

$$\begin{aligned} \mathbb{E} \sum_{t=1}^T V_M^\pi(\pi^t(s), T) &= \mathbb{E} \sum_{t=1}^T \sum_{p(\pi^t(s))} \mathbb{P}[p(\pi^t(s))] V_M(p(\pi^t(s))) \\ &= \mathbb{E} \sum_{t=1}^T \sum_{q(\pi^t(s))} \mathbb{P}[q(\pi^t(s))] V_M(q(\pi^t(s))) \\ &\quad + \mathbb{E} \sum_{t=1}^T \sum_{r(\pi^t(s))} \mathbb{P}[r(\pi^t(s))] V_M(r(\pi^t(s))) \end{aligned}$$

since  $p(\pi^t(s)) = q(\pi^t(s)) \cup r(\pi^t(s))$ , which is a disjoint union. Next,

$$\begin{aligned} &\mathbb{E} \sum_{t=1}^T \sum_{q(\pi^t(s))} \mathbb{P}[q(\pi^t(s))] V_M(q(\pi^t(s))) \\ &= \mathbb{E} \sum_{t=1}^T \sum_{q(\pi^t(s))} \mathbb{P}_{M_\Gamma}^\pi[q(\pi^t(s))] V_{M_\Gamma}(q(\pi^t(s))) \\ &\leq \mathbb{E} \sum_{t=1}^T V_{M_\Gamma}^\pi(\pi^t(s), T), \end{aligned}$$

where the equality is due to Definition 9 and the definition of  $q$ , and the inequality follows because  $V_{M_\Gamma}^\pi(\pi^t(s), T)$  is the sum over all the  $T$ -paths in  $M_\Gamma$ , not just those that avoid the absorbing state  $s_0$ . Therefore by our original assumption on  $\pi$ ,

$$\begin{aligned} &\mathbb{E} \sum_{t=1}^T \sum_{q(\pi^t(s))} \mathbb{P}[q(\pi^t(s))] V_M(q(\pi^t(s))) \\ &\leq \mathbb{E} \sum_{t=1}^T V_{M_\Gamma}^\pi(\pi^t(s), T) < T\tilde{V} - T\beta. \end{aligned}$$

This implies

$$\begin{aligned}
 & \mathbb{E} \sum_{t=1}^T \sum_{r(\pi^t(s))} \mathbb{P}[r(\pi^t(s))] V_M(r(\pi^t(s))) \\
 &= \mathbb{E} \sum_{t=1}^T V_M^\pi(\pi^t(s), T) \\
 &- \mathbb{E} \sum_{t=1}^T \sum_{q(\pi^t(s))} \mathbb{P}[q(\pi^t(s))] V_M(q(\pi^t(s))) \\
 &= T\tilde{V} - \mathbb{E} \sum_{t=1}^T \sum_{q(\pi^t(s))} \mathbb{P}[q(\pi^t(s))] V_M(q(\pi^t(s))) \geq T\beta,
 \end{aligned}$$

where the last step is the result of applying the previous inequality. However,

$$\begin{aligned}
 & \mathbb{E} \sum_{t=1}^T \sum_{r(\pi^t(s))} \mathbb{P}[r(\pi^t(s))] V_M(r(\pi^t(s))) \\
 &\leq T\mathbb{E} \sum_{t=1}^T \sum_{r(\pi^t(s))} \mathbb{P}[r(\pi^t(s))],
 \end{aligned}$$

because it is immediate that  $V_M(r(\pi^t(s))) \leq T$  for all  $\pi^t(s)$ . So  $T\beta \leq T\mathbb{E} \sum_{t=1}^T \sum_{r(\pi^t(s))} \mathbb{P}[r(\pi^t(s))]$ . Finally, if we let  $\mathbb{P}_{2T}^\pi$  denote the probability that a walk of  $2T$  steps following  $\pi$  terminates in  $s_0$ , i.e. the probability that  $\pi$  escapes to an unknown state within  $2T$  steps, then for each  $t \in [T]$ ,  $\mathbb{E} \sum_{r(\pi^t(s))} \leq T\mathbb{P}_{2T}^\pi$ . It follows that

$$T\beta \leq T^2\mathbb{P}_{2T}^\pi$$

and rearranging yields  $\mathbb{P}_{2T}^\pi \geq \frac{\beta}{T}$  as desired.

Next, note that the exploitation policy (if it exists) can be derived by computing the optimal policy in  $M_\Gamma$ . Moreover, the exploration policy (if it exists) in the exploitation MDP  $M_\Gamma$  can indeed be derived by computing the optimal policy in the exploration MDP  $M_{[n]\setminus\Gamma}$  as observed by (Kearns and Singh, 2002). Finally, by Observation 5, any optimal policy in  $\hat{M}_\Gamma^\alpha$  ( $\hat{M}_{[n]\setminus\Gamma}^\alpha$ ) is an optimal policy in  $\hat{M}_\Gamma$  ( $\hat{M}_{[n]\setminus\Gamma}$ )  $\square$

To prove Lemma 10, we need some useful background adapted from Kearns and Singh (2002).

**Definition 8** (Definition 7, Kearns and Singh (2002)). *Let  $M$  and  $\hat{M}$  be two MDPs with the same set of states and actions. We say  $\hat{M}$  is a  $\beta$ -approximation of  $M$  if*

- For any state  $s$ ,

$$\bar{R}_M(s) - \beta \leq \bar{R}_{\hat{M}}(s) \leq \bar{R}_M(s) + \beta.$$

- For any states  $s$  and  $s'$  and action  $a$ ,

$$P_M(s, a, s') - \beta \leq P_{\hat{M}}(s, a, s') \leq P_M(s, a, s') + \beta.$$

**Lemma 12** (Lemma 5, Kearns and Singh (2002)). *Let  $M$  be an MDP and  $\Gamma$  the set of known states of  $M$ . For any  $s, s' \in \Gamma$  and action  $a \in A$ , let  $\hat{P}_M(s, a, s')$  denote the empirical probability transition estimates obtained from the visits to  $s$ . Moreover, for any state  $s \in \Gamma$  let  $\hat{R}(s)$  denote the empirical estimates of the average reward obtained from visits to  $s$ . Then with probability at least  $1 - \delta$ ,*

$$|\hat{P}_M(s, a, s') - P_M(s, a, s')| = O\left(\frac{\min\{\epsilon, \alpha\}^2}{n^2 H_\epsilon^{\gamma^4}}\right),$$

and

$$|\hat{R}_M(s) - \bar{R}_M(s)| = O\left(\frac{\min\{\epsilon, \alpha\}^2}{n^2 H_\epsilon^{\gamma^4}}\right).$$

Lemma 12 shows that  $\hat{M}_\Gamma$  and  $\hat{M}_{[n]\setminus\Gamma}$  are  $O(\frac{\min\{\epsilon, \alpha\}^2}{n^2 H_\epsilon^{\gamma^4}})$ -approximation MDPs for  $M_\Gamma$  and  $M_{[n]\setminus\Gamma}$ , respectively.

**Lemma 13** (Lemma 4, Kearns and Singh (2002)). *Let  $M$  be an MDP and  $\hat{M}$  its  $O(\frac{\min\{\epsilon, \alpha\}^2}{n^2 H_\epsilon^{\gamma^4}})$ -approximation. Then for any policy  $\pi \in \Pi$  and any state  $s$  and action  $a$*

$$V_M^\pi(s) - \min\{\epsilon, \alpha\} \leq V_{\hat{M}}^\pi(s) \leq V_M^\pi(s) + \min\{\epsilon, \frac{\alpha}{4}\},$$

and

$$\begin{aligned}
 Q_M^\pi(s, a) - \min\{\frac{\alpha}{4}, \epsilon\} &\leq Q_{\hat{M}}^\pi(s, a) \\
 &\leq Q_M^\pi(s, a) + \min\{\frac{\alpha}{4}, \epsilon\}.
 \end{aligned}$$

*Proof of Lemma 10.* By Definition 7 and Lemma 12,  $\hat{M}_\Gamma$  is a  $O(\frac{\min\{\epsilon, \alpha\}^2}{n^2 H_\epsilon^{\gamma^4}})$ -approximation of  $M_\Gamma$ . Then the statement directly follows by applying Lemma 13.  $\square$

*Rest of the Proof of Theorem 6.* The only remaining part of the proof of Theorem 6 is the analysis of the probability of failure of **Fair-E**<sup>3</sup>. To do so, we break down the probability of failure of **Fair-E**<sup>3</sup> by considering the following (exhaustive) list of possible failures:

1. At some known state the algorithm has a poor approximation of the next step, causing  $\hat{M}_\Gamma$  to not be a  $O(\frac{\min\{\epsilon, \alpha\}^2}{n^2 H_\epsilon^{\gamma^4}})$ -approximation of  $M_\Gamma$ .
2. At some known state the algorithm has a poor approximation of the  $Q_M^*$  values for one of the actions.
3. Following the exploration policy for  $2T_\epsilon^*$  steps fails to yield enough visits to unknown states.
4. At some known state, the approximation value of that state in  $\hat{M}_\Gamma$  is not an accurate estimate for the value of the state in  $M_\Gamma$ .

We allocate  $\frac{\delta}{4}$  of our total probability of failure to each of these sources:

1. Set  $\delta' = \frac{\delta}{4n}$  in Lemma 10.
2. Set  $\delta' = \frac{\delta}{4nk}$  in Theorem 7.
3. By Lemma 8, each attempted exploration is a Bernoulli trial with probability of success of at least  $\frac{\epsilon}{4T_\epsilon^*}$ . In the worst case we might need to make every state known before exploiting, leading to the  $nm_Q$  trajectories ( $m_Q$  as Equation 3 in Definition 7) of length  $H_\epsilon^\gamma$ . Therefore, the probability of taking fewer than  $nm_Q$  trajectories of length  $H_\epsilon^\gamma$  would be bounded by  $\frac{\delta}{4}$  if the number of  $2T_\epsilon^*$  steps explorations is at least

$$m_{\text{exp}} = O\left(\frac{T_\epsilon^* nm_Q}{\epsilon} \log\left(\frac{n}{\delta}\right)\right). \quad (5)$$

4. Set  $\delta' = \frac{\delta}{4m_{\text{exp}}}$  ( $m_{\text{exp}}$  as defined in Equation 5) in Lemma 10, as **Fair-E**<sup>3</sup> might make  $2T_\epsilon^*$  steps explorations up to  $m_{\text{exp}}$  times. □

#### A.4. Relaxing Assumption 2

Throughout Sections 4.3 and 4.4 we assumed that  $T_\epsilon^*$ , the  $\epsilon$ -mixing time of the optimal policy  $\pi^*$ , was known (see Assumption 2). Although **Fair-E**<sup>3</sup> uses the knowledge of  $T_\epsilon^*$  to decide whether to follow the exploration or exploitation policy, Lemma 8 continues to hold even without this assumption. Note that **Fair-E**<sup>3</sup> is parameterized by  $T_\epsilon^*$  and for any input  $T_\epsilon^*$  runs in time **poly**( $T_\epsilon^*$ ). Thus if  $T_\epsilon^*$  is unknown, we can simply run **Fair-E**<sup>3</sup> for  $T_\epsilon^* = 1, 2, \dots$  sequentially and the running time and sample complexity will still be **poly**( $T_\epsilon^*$ ). Similar to the analysis of **Fair-E**<sup>3</sup> when  $T_\epsilon^*$  is known we have to run the new algorithm for sufficiently many steps so that the possibly low  $V_M^*$  values of the visited states in the early stages are dominated by the near-optimal  $V_M^*$  values of the visited states for large enough guessed values of  $T_\epsilon^*$ .

## B. Observations on Optimality and Fairness

**Observation 1.** *For any MDP  $M$ , there exists an optimal policy  $\pi^*$  such that  $\pi^*$  is fair.*

*Proof.* In time  $t$ , let state  $s_t$  denote the state from which  $\pi$  chooses an action. Let  $a^* = \operatorname{argmax}_a Q_M^*(s_t, a)$  and  $A^*(s_t) = \{a \in A \mid Q_M^*(s_t, a) = Q_M^*(s_t, a^*)\}$ . The policy of playing an action uniformly at random from  $A^*(s_t)$  in state  $s_t$  for all  $t$ , is fair and optimal. □

Approximate-action fairness, conversely, can be satisfied by any optimal policy, even a deterministic one.

**Observation 2.** *Let  $\pi^*$  be an optimal policy in MDP  $M$ . Then  $\pi^*$  is approximate-action fair.*

*Proof.* Assume that  $\pi^*$  is not approximate-action fair. Given state  $s$ , the action that  $\pi^*$  takes from  $s$  is uniquely determined since  $\pi^*$  is deterministic we may denote it by  $a^*$ . Then there exists a time step in which  $\pi^*$  is in state  $s$  and chooses action  $a^*(s)$  such that there exists another action  $a$  with

$$Q_M^*(s, a) > Q_M^*(s, a^*(s)) + \alpha,$$

a contradiction of the optimality of  $\pi^*$ . □

Observations 1 and 2 state that policies with optimal performance are fair; we now state that playing an action uniformly at random is also fair.

**Observation 3.** *An algorithm that, in every state, plays each action uniformly at random (regardless of the history) is fair.*

*Proof.* Let  $\mathcal{L}$  denote an algorithm that in every state plays uniformly at random between all available actions. Then  $\mathcal{L}(s, h_{t-1})_a = \mathcal{L}(s, h_{t-1})_{a'}$  regardless of state  $s$ , (available) action  $a$ , or history  $h_{t-1}$ .  $Q_M^*(s, a) > Q_M^*(s, a') + \alpha \Rightarrow \mathcal{L}(s, h_{t-1})_a \geq \mathcal{L}(s, h_{t-1})_{a'}$  then follows immediately, which guarantees both fairness and approximate-action fairness. □

**Observation 4.** *Let  $M$  be an MDP and  $M^\alpha$  the  $\alpha$ -restricted MDP of  $M$ . Let  $\pi$  be a policy in  $M^\alpha$ . Then  $\pi$  is  $\alpha$ -action fair.*

*Proof.* Assume  $\pi$  is not  $\alpha$ -action fair. Then there must exist round  $t$ , state  $s$ , and action  $a$  such that  $Q_M^*(s, a) > Q_M^*(s, a') + \alpha$  and  $\mathcal{L}(s, h_{t-1})_a < \mathcal{L}(s, h_{t-1})_{a'}$ . Therefore  $\mathcal{L}(s, h_{t-1})_{a'} > 0$ , so  $M^\alpha$  must include action  $a'$  from state  $s$ . But this is a contradiction, as in state  $s$   $M^\alpha$  only includes actions  $a'$  such that  $Q_M^*(s, a') + \alpha \geq Q_M^*(s, a)$ .  $\pi$  is therefore  $\alpha$ -action fair. □

**Observation 5.** *Let  $M$  be an MDP and  $M^\alpha$  the  $\alpha$ -restricted MDP of  $M$ . Let  $\pi^*$  be an optimal policy in  $M^\alpha$ . Then  $\pi^*$  is also optimal in  $M$ .*

*Proof.* If  $\pi^*$  is not optimal in  $M$ , then there exists a state  $s$  and action  $a$  such that  $Q_M^*(s, a) > \mathbb{E}_{a^*(s) \sim \pi^*(s)} Q_M^*(s, a^*(s))$  where  $a^*(s)$  is drawn from  $\pi^*(s)$  and the expectation is taken over choices of  $a^*(s)$ . This is a contradiction because action  $a$  is available from state  $s$  in  $M^\alpha$  by Definition 5. □

## C. Omitted Details of Fair-E<sup>3</sup>

We first formally define the exploitation MDP  $M_\Gamma$  and the exploration MDP  $M_{[n] \setminus \Gamma}$ :

**Definition 9** (Definition 9, Kearns and Singh (2002)). *Let  $M = (\mathcal{S}_M, \mathcal{A}_M, P_M, R_M, T, \gamma)$  be an MDP with state space  $\mathcal{S}_M$  and let  $\Gamma \subset \mathcal{S}_M$ . We define the exploration MDP  $M_\Gamma = (\mathcal{S}_{M_\Gamma}, \mathcal{A}_M, P_{M_\Gamma}, R_{M_\Gamma}, T, \gamma)$  on  $\Gamma$  where*

- $\mathcal{S}_{M_\Gamma} = \Gamma \cup \{s_0\}$ .
- For any state  $s \in \Gamma$ ,  $\bar{R}_{M_\Gamma}(s) = \bar{R}_M(s)$ , rewards in  $M_\Gamma$  are deterministic, and  $\bar{R}_{M_\Gamma}(s_0) = 0$ .
- For any action  $a$ ,  $P_{M_\Gamma}(s_0, a, s_0) = 1$ . Hence,  $s_0$  is an absorbing state.
- For any states  $s_1, s_2 \in \Gamma$  and any action  $a$ ,  $P_{M_\Gamma}(s_1, a, s_2) = P_M(s_1, a, s_2)$ , i.e. transitions between states in  $\Gamma$  are preserved in  $M_\Gamma$ .
- For any state  $s_1 \in \Gamma$  and any action  $a$ ,  $P_{M_\Gamma}(s_1, a, s_0) = \sum_{s_2 \notin \Gamma} P_M(s_1, a, s_2)$ . Therefore, all the transitions between a state in  $\Gamma$  and states not in  $\Gamma$  are directed to  $s_0$  in  $M_\Gamma$ .

**Definition 10** (Implicit, Kearns and Singh (2002)). *Given MDP  $M$  and set of known states  $\Gamma$ , the exploration MDP  $M_{[n]\setminus\Gamma}$  on  $\Gamma$  is identical to the exploitation MDP  $M_\Gamma$  except for its reward function. Specifically, rewards in  $M_{[n]\setminus\Gamma}$  are deterministic as in  $M_\Gamma$ , but for any state  $s \in \Gamma$ ,  $\bar{R}_{M_{[n]\setminus\Gamma}}(s) = 0$ , and  $\bar{R}_{M_{[n]\setminus\Gamma}}(s_0) = 1$ .*

We next define the approximation MDPs  $\hat{M}_\Gamma$  and  $\hat{M}_{[n]\setminus\Gamma}$  which are defined over the same set of states and actions as in  $M_\Gamma$  and  $M_{[n]\setminus\Gamma}$ , respectively.

Let  $M$  be an MDP and  $\Gamma$  the set of known states of  $M$ . For any  $s, s' \in \Gamma$  and action  $a \in A$ , let  $\hat{P}_{M_\Gamma}(s, a, s')$  denote the empirical probability transition estimates obtained from the visits to  $s$ . Moreover, for any state  $s \in \Gamma$  let  $\hat{\bar{R}}_{M_\Gamma}(s)$  denote the empirical estimates of the average reward obtained from visits to  $s$ . Then  $\hat{M}_\Gamma$  is identical to  $M_\Gamma$  except that:

- in any known state  $s \in \Gamma$ ,  $\hat{R}_{\hat{M}_\Gamma}(s) = \hat{\bar{R}}_{M_\Gamma}(s)$ .
- for any  $s, s' \in \Gamma$  and action  $a \in A$ ,  $P_{\hat{M}_\Gamma}(s, a, s') = \hat{P}_{M_\Gamma}(s, a, s')$ .

Also  $\hat{M}_{[n]\setminus\Gamma}$  is identical to  $M_{[n]\setminus\Gamma}$  except that:

- for any  $s, s' \in \Gamma$  and action  $a \in A$ ,  $P_{\hat{M}_{[n]\setminus\Gamma}}(s, a, s') = \hat{P}_{M_{[n]\setminus\Gamma}}(s, a, s')$ .
